# Supplementary material
Source: Springer Nature journal article supplement (https://www.springermedizin.de/resource/supplementary/13044_2010_22_MOESM2_ESM.pdf/9659972)

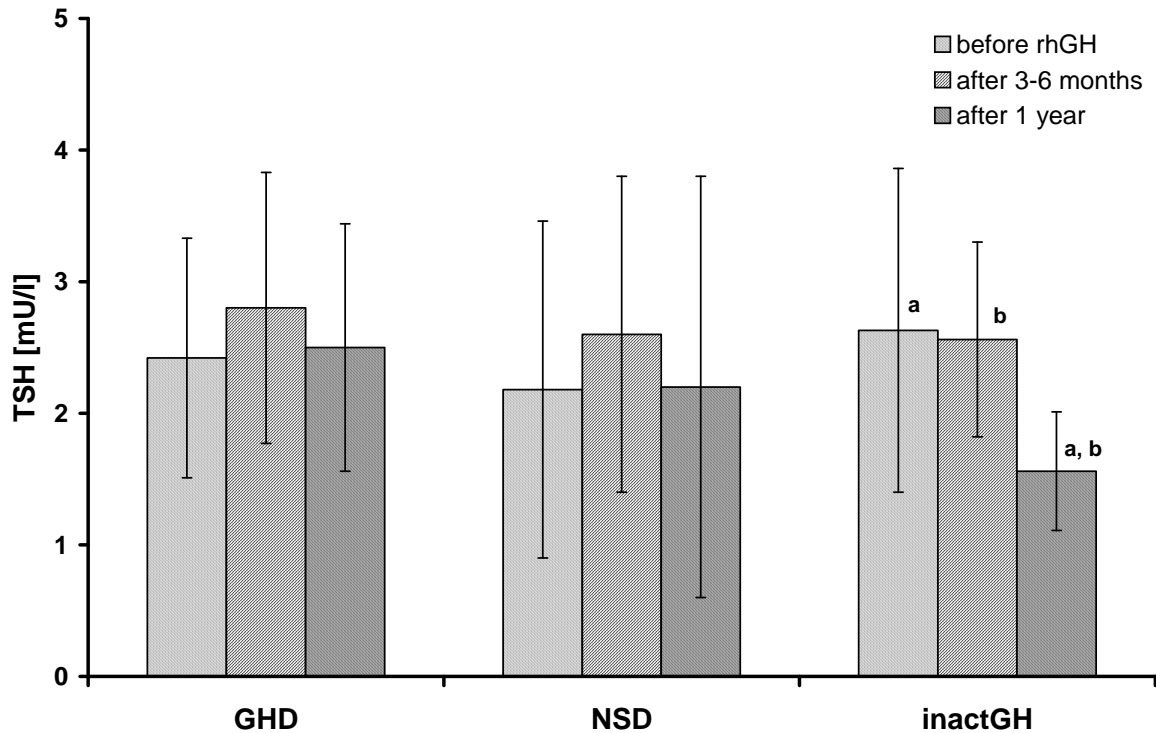

Significant differences: a, b –  $p < 0.05$

Supplement: MOESM2 [file 9659972]
